# Supplementary material for: Safety, tolerability, and preliminary effects of cricket chitin for adults with IBS: a double-blind randomized crossover pilot trial
Source: Royal Society of Chemistry journal article supplement (doi:10.1039/d5fo01540e), 2025-01-01
Supplement: d5fo01540e1.pdf [file d5fo01540e1.pdf]

## Supplementary Materials

Supplemental Table 1. CONSORT Checklist

| Table S1   CONSORT checklist of information to include when reporting randomized crossover trials |         |                                                                                                                                                                                                                                                                   |                                 |
|---------------------------------------------------------------------------------------------------|---------|-------------------------------------------------------------------------------------------------------------------------------------------------------------------------------------------------------------------------------------------------------------------|---------------------------------|
| Section/topic                                                                                     | Item No | Description                                                                                                                                                                                                                                                       | Page No*                        |
| Title†                                                                                            | 1a      | Identification as a randomized crossover trial in the title                                                                                                                                                                                                       | 1                               |
| Abstract†                                                                                         | 1b      | Specify a crossover design and report all information outlined in table 2                                                                                                                                                                                         | 1                               |
| Introduction:                                                                                     |         |                                                                                                                                                                                                                                                                   |                                 |
| Background‡                                                                                       | 2a      | Scientific background and explanation of rationale                                                                                                                                                                                                                | 2-3                             |
| Objectives‡                                                                                       | 2b      | Specific objectives or hypotheses                                                                                                                                                                                                                                 | 3                               |
| Methods:                                                                                          |         |                                                                                                                                                                                                                                                                   |                                 |
| Trial design†                                                                                     | 3a      | Rationale for a crossover design. Description of the design features including allocation ratio, especially the number and duration of periods, duration of washout period, and consideration of carry over effect                                                | 4, Figure 1                     |
| Change from protocol‡                                                                             | 3b      | Important changes to methods after trial commencement (such as eligibility criteria), with reasons                                                                                                                                                                | N/A                             |
| Participants‡                                                                                     | 4a      | Eligibility criteria for participants                                                                                                                                                                                                                             | 5                               |
| Settings and location‡                                                                            | 4b      | Settings and locations where the data were collected                                                                                                                                                                                                              | 5                               |
| Interventions†                                                                                    | 5       | The interventions with sufficient details to allow replication, including how and when they were actually administered                                                                                                                                            | 4-6                             |
| Outcomes‡                                                                                         | 6a      | Completely defined prespecified primary and secondary outcome measures, including how and when they were assessed                                                                                                                                                 | 6-8                             |
| Changes to outcomes‡                                                                              | 6b      | Any changes to trial outcomes after the trial commenced, with reasons                                                                                                                                                                                             | N/A                             |
| Sample size†                                                                                      | 7a      | How sample size was determined, accounting for within participant variability                                                                                                                                                                                     | 5                               |
| Interim analyses and stopping guidelines‡                                                         | 7b      | When applicable, explanation of any interim analyses and stopping guidelines                                                                                                                                                                                      | N/A                             |
| Randomization:                                                                                    |         |                                                                                                                                                                                                                                                                   |                                 |
| Sequence generation‡                                                                              | 8a      | Method used to generate the random allocation sequence                                                                                                                                                                                                            | 4-5                             |
| Sequence generation‡                                                                              | 8b      | Type of randomization; details of any restriction (such as blocking and block size)                                                                                                                                                                               | 5                               |
| Allocation concealment mechanism‡                                                                 | 9       | Mechanism used to implement the random allocation sequence\$ (such as sequentially numbered containers), describing any steps taken to conceal the sequence until interventions were assigned                                                                     | 5                               |
| Implementation†                                                                                   | 10      | Who generated the random allocation sequence,\$ who enrolled participants, and who assigned participants to the sequence of interventions                                                                                                                         | 5                               |
| Blinding‡                                                                                         | 11a     | If done, who was blinded after assignment to interventions (for example, participants, care providers, those assessing outcomes) and how                                                                                                                          | 4                               |
| Similarity of interventions‡                                                                      | 11b     | If relevant, description of the similarity of interventions                                                                                                                                                                                                       | N/A                             |
| Statistical methods†                                                                              | 12a     | Statistical methods used to compare groups for primary and secondary outcomes which are appropriate for crossover design (that is, based on within participant comparison)                                                                                        | 9-10                            |
| Additional analyses‡                                                                              | 12b     | Methods for additional analyses, such as subgroup analyses and adjusted analyses                                                                                                                                                                                  | N/A                             |
| Results                                                                                           |         |                                                                                                                                                                                                                                                                   |                                 |
| Participant flow (a diagram is strongly recommended)†                                             | 13a     | The numbers of participants who were randomly assigned, received intended treatment, and were analyzed for the primary outcome, separately for each sequence and period                                                                                           | 9 and Figure 2                  |
| Losses and exclusions†                                                                            | 13b     | No of participants excluded at each stage, with reasons, separately for each sequence and period                                                                                                                                                                  | 9 and Figure 2                  |
| Recruitment‡                                                                                      | 14a     | Dates defining the periods of recruitment and follow-up                                                                                                                                                                                                           | 5                               |
| Trial end‡                                                                                        | 14b     | Why the trial ended or was stopped                                                                                                                                                                                                                                | N/A                             |
| Baseline data†                                                                                    | 15      | A table showing baseline demographic and clinical characteristics by sequence and period                                                                                                                                                                          | Supplementary Table 4           |
| Numbers analyzed†                                                                                 | 16      | Number of participants (denominator) included in each analysis and whether the analysis was by original assigned groups                                                                                                                                           | 10                              |
| Outcomes and estimation†                                                                          | 17a     | For each primary and secondary outcome, results including estimated effect size and its precision (such as 95% confidence interval) should be based on within participant comparisons.¶ In addition, results for each intervention in each period are recommended | 12-15 and Supplementary Table 4 |
| Binary outcomes‡                                                                                  | 17b     | For binary outcomes, presentation of both absolute and relative effect sizes is recommended                                                                                                                                                                       | N/A                             |

|                                                                                                                                                                                                                                                                                                                                                                                                                                                                                                                                                                                                                                                                                                                                                                                          |    |                                                                                                                                                        |         |
|------------------------------------------------------------------------------------------------------------------------------------------------------------------------------------------------------------------------------------------------------------------------------------------------------------------------------------------------------------------------------------------------------------------------------------------------------------------------------------------------------------------------------------------------------------------------------------------------------------------------------------------------------------------------------------------------------------------------------------------------------------------------------------------|----|--------------------------------------------------------------------------------------------------------------------------------------------------------|---------|
| Ancillary analyses‡                                                                                                                                                                                                                                                                                                                                                                                                                                                                                                                                                                                                                                                                                                                                                                      | 18 | Results of any other analyses performed, including subgroup analyses and adjusted analyses, distinguishing prespecified from exploratory               | N/A     |
| Harms‡                                                                                                                                                                                                                                                                                                                                                                                                                                                                                                                                                                                                                                                                                                                                                                                   | 19 | Describe all important harms or untended effects in a way that accounts for the design (for specific guidance, see CONSORT for harms <sup>12</sup> )   | N/A     |
| Discussion:                                                                                                                                                                                                                                                                                                                                                                                                                                                                                                                                                                                                                                                                                                                                                                              |    |                                                                                                                                                        |         |
| Limitations‡                                                                                                                                                                                                                                                                                                                                                                                                                                                                                                                                                                                                                                                                                                                                                                             | 20 | Trial limitations, addressing sources of potential bias, imprecision, and if relevant, multiplicity of analyses. Consider potential carry over effects | 24      |
| Generalizability‡                                                                                                                                                                                                                                                                                                                                                                                                                                                                                                                                                                                                                                                                                                                                                                        | 21 | Generalizability (external validity, applicability) of the trial findings                                                                              | 24      |
| Interpretation‡                                                                                                                                                                                                                                                                                                                                                                                                                                                                                                                                                                                                                                                                                                                                                                          | 22 | Interpretation consistent with results, balancing benefits and harms, and considering other relevant evidence                                          | 20-24   |
| Other information:                                                                                                                                                                                                                                                                                                                                                                                                                                                                                                                                                                                                                                                                                                                                                                       |    |                                                                                                                                                        |         |
| Registration‡                                                                                                                                                                                                                                                                                                                                                                                                                                                                                                                                                                                                                                                                                                                                                                            | 23 | Registration number and name of trial registry                                                                                                         | 1 and 4 |
| Protocol‡                                                                                                                                                                                                                                                                                                                                                                                                                                                                                                                                                                                                                                                                                                                                                                                | 24 | Where the full trial protocol can be accessed, if available                                                                                            | N/A     |
| Funding‡                                                                                                                                                                                                                                                                                                                                                                                                                                                                                                                                                                                                                                                                                                                                                                                 | 25 | Sources of funding and other support (such as supply of drugs), role of funders                                                                        | 1       |
| <p>CONSORT=Consolidated Standards of Reporting Trials.</p> <p>*Note: page numbers are optional depending on journal requirements. The page numbers shown here refer to the submitted manuscript.</p> <p>‡Modified original CONSORT item.</p> <p>‡Unmodified CONSORT item.</p> <p>§Random sequence here refers to a list of random orders, typically generated through a computer program. This should not be confused with the sequence of interventions in a randomized crossover trial, for example receiving intervention A before B for an individual trial participant.</p> <p>¶A within participant comparison takes into account the correlation between measurements for each participant because they act as their own control, therefore measurements are not independent.</p> |    |                                                                                                                                                        |         |

Supplemental Table 1. This study was conducted in compliance with the CONSORT checklist. Shown are the CONSORT checklist items and page numbers and/or figure/table numbers where the information can be found.

Supplemental Table 2. Nutrient Analysis Summary

|                                 | Comparator           |                      |                   | Chitin               |                     |                   |
|---------------------------------|----------------------|----------------------|-------------------|----------------------|---------------------|-------------------|
|                                 | Baseline<br>M (SD)   | Final<br>M (SD)      | M <sub>diff</sub> | Baseline<br>M (SD)   | Final<br>M (SD)     | M <sub>diff</sub> |
| <b>Kilocalories (kcal)</b>      | 2078.46<br>(1091.61) | 2773.98<br>(1676.70) | 695.51            | 2181.88<br>(1219.97) | 2236.30<br>(957.64) | 54.42             |
| <b>Protein, Total (g)</b>       | 88.72<br>(50.72)     | 96.17<br>(61.87)     | 7.45              | 87.80<br>(45.07)     | 84.59<br>(34.47)    | -3.21             |
| <b>Protein (% kcal)</b>         | 4.06<br>(1.09)       | 3.54<br>(0.64)       | <b>-0.51</b>      | 3.86<br>(0.64)       | 3.83<br>(0.64)      | <b>-0.03</b>      |
| <b>Carbohydrate, Total (g)</b>  | 237.46<br>(130.45)   | 305.92<br>(186.56)   | 68.46             | 269.67<br>(194.83)   | 251.45<br>(123.89)  | -18.22            |
| <b>Carbohydrate (% kcal)</b>    | 11.30<br>(1.72)      | 10.99<br>(1.96)      | <b>-0.31</b>      | 11.33<br>(1.77)      | 11.12<br>(1.52)     | <b>-0.20</b>      |
| <b>Fat, Total (g)</b>           | 78.66<br>(38.53)     | 124.31<br>(77.43)    | 45.64             | 93.97<br>(43.94)     | 95.32<br>(42.31)    | 1.35              |
| <b>Fat (% kcal)</b>             | 4.12<br>(1.11)       | 4.51<br>(0.70)       | <b>0.40</b>       | 4.26<br>(0.81)       | 4.37<br>(0.58)      | <b>0.11</b>       |
| <b>Dietary Fiber, Total (g)</b> | 24.86<br>(13.25)     | 25.37<br>(11.72)     | 0.51              | 19.94<br>(8.23)      | 21.71<br>(11.45)    | 1.76              |
| <b>Dietary Fiber (% kcal)</b>   | 1.39<br>(0.55)       | 0.91<br>(0.70)       | <b>-0.47</b>      | 0.95<br>(0.42)       | 1.02<br>(0.39)      | <b>0.07</b>       |
| <b>Alcohol (% kcal)</b>         | 0.17<br>(0.33)       | 0.24<br>(0.30)       | 0.07              | 0.27<br>(0.54)       | 0.38<br>(0.47)      | 0.11              |

Supplemental Table 2. Shown are the intake of macronutrients and alcohol, calculated from 3-day food logs and returned at each study visit. Macronutrients are reported as total intake in grams (g) and as percentage of total kilocalories (% kcal). Of note, all pre-post changes in macronutrients that are calculated as % kcal are under 1 percent; these values are bolded.

Supplemental Table 3. Micronutrient Composition of Cricket Chitin

|           | Concentration (mg/g) | Limit of Detection | Limit of Quantification |
|-----------|----------------------|--------------------|-------------------------|
| <b>Al</b> | 1220                 | 0.3                | 0.9                     |
| <b>As</b> | 0.00438              | 2.00E-03           | 5.00E-03                |
| <b>B</b>  | 0.232                | 0.05               | 0.1                     |
| <b>Ba</b> | 4.11                 | 3.00E-02           | 0.07                    |
| <b>Be</b> | 2.27E-03             | 0.002              | 0.003                   |
| <b>Ca</b> | 1670                 | 2                  | 4                       |
| <b>Cd</b> | 0.0119               | 3.00E-03           | 0.008                   |
| <b>Co</b> | 0.0167               | 2.00E-04           | 0.0007                  |
| <b>Cr</b> | 0.629                | 0.003              | 0.009                   |
| <b>Cu</b> | 40.1                 | 0.02               | 0.05                    |
| <b>Fe</b> | 63.6                 | 0.3                | 0.8                     |
| <b>K</b>  | 19.3                 | 0.6                | 2                       |
| <b>Li</b> | 0.021                | 0.02               | 0.06                    |
| <b>Mg</b> | 253                  | 0.3                | 0.9                     |
| <b>Mn</b> | 4.27                 | 0.003              | 0.008                   |
| <b>Mo</b> | 0.0211               | 0.0006             | 0.002                   |
| <b>Na</b> | 66.2                 | 0.9                | 3                       |
| <b>Ni</b> | 0.394                | 0.003              | 0.0098                  |
| <b>P</b>  | 61.6                 | 1                  | 3                       |
| <b>Pb</b> | 2.64                 | 0.0008             | 0.002                   |
| <b>S</b>  | <LOD                 | 50                 | 100                     |
| <b>Se</b> | <LOD                 | 0.04               | 0.1                     |
| <b>Sr</b> | 4.73                 | 4.00E-03           | 0.01                    |
| <b>V</b>  | 0.138                | 2.00E-03           | 0.004                   |
| <b>W</b>  | <LOD                 | 2.00E-03           | 0.006                   |
| <b>Zn</b> | 120                  | 0.3                | 0.7                     |

Supplemental Table 3. Shown is the micronutrient composition of cricket chitin, including micronutrient concentration, limit of detection, and limit of quantification values. These values represent the composition found in 22g of cricket chitin, which is the daily dose of the chitin intervention.

Supplemental Table 4. Overview of physiological measures throughout the study.

|                                      | Comparator         |                   |                                                | Chitin            |                   |                                                |
|--------------------------------------|--------------------|-------------------|------------------------------------------------|-------------------|-------------------|------------------------------------------------|
|                                      | Baseline           | Final             | Final - Baseline                               | Baseline          | Final             | Final - Baseline                               |
| <b>Serum Inflammatory Biomarkers</b> | M (SD)             | M (SD)            | M <sub>diff</sub><br>[95% CI <sub>diff</sub> ] | M (SD)            | M (SD)            | M <sub>diff</sub><br>[95% CI <sub>diff</sub> ] |
| TNF-α                                | 39.55<br>(24.23)   | 36.22<br>(20.79)  | -3.326<br>[10.92 to 4.26]                      | 21.36<br>(20.46)  | 19.04<br>(29.88)  | -2.337<br>[10.86 to 6.18]                      |
| hsCRP                                | 7669<br>(17.54)    | 7770<br>(22.48)   | 101.2<br>[-2667 to 2869]                       | 8805<br>(28.36)   | 7726<br>(18.76)   | -1079<br>[-4127 to 1970]                       |
| IL-10                                | 249.83<br>(240.03) | 249.3<br>(229.75) | -0.5000<br>[-72.17 to 71.17]                   | 169.4<br>(181.34) | 157.8<br>(200.61) | -11.58<br>[-89.21 to 66.04]                    |
| IL-6                                 | 12.62<br>(17.54)   | 13.24<br>(22.48)  | 0.6124<br>[-1.99 to 3.21]                      | 14.79<br>(28.36)  | 11.04<br>(18.76)  | -3.749<br>[-10.60 to 3.10]                     |
| serum lipocalin                      | 17.12<br>(10.44)   | 15.40<br>(10.21)  | -1.712<br>[-10.57 to 7.15]                     | 16.02<br>(6.86)   | 15.75<br>(8.28)   | -0.2670<br>[-7.49 to 6.97]                     |
| <b>Fecal inflammatory biomarkers</b> | M (SD)             | M (SD)            | M <sub>diff</sub><br>[95% CI <sub>diff</sub> ] | M (SD)            | M (SD)            | M <sub>diff</sub><br>[95% CI <sub>diff</sub> ] |
| fecal calprotectin                   | 86.87<br>(168.16)  | 29.17<br>(28.51)  | -57.17<br>[-188.3 to 73.95]                    | 42.61<br>(64.13)  | 37.17<br>(60.45)  | -3.951<br>[-30.69 to 22.79]                    |
| fecal lipocalin                      | 73.87<br>(27.12)   | 55.80<br>(22.11)  | -18.07<br>[-76.57 to 40.44]                    | 44.86<br>(41.40)  | 54.14<br>(43.98)  | 9.286<br>[-13.09 to 31.66]                     |
| sIGA                                 | 1.70<br>(1.14)     | 1.91<br>(1.48)    | -0.3583<br>[-1.70 to 0.98]                     | 3.04<br>(1.88)    | 2.52<br>(1.11)    | -0.1232<br>[-1.34 to 1.09]                     |
| <b>Lipid Panel</b>                   | M (SD)             | M (SD)            | M <sub>diff</sub><br>[95% CI <sub>diff</sub> ] | M (SD)            | M (SD)            | M <sub>diff</sub><br>[95% CI <sub>diff</sub> ] |
| TCH                                  | 184.6<br>(38.69)   | 186.47<br>(25.62) | 1.571<br>[-16.03 to 19.17]                     | 183.9<br>(35.39)  | 186.50<br>(31.05) | 2.563<br>[-10.90 to 16.02]                     |
| HDL                                  | 62.71<br>(10.24)   | 66.43<br>(10.14)  | 3.714<br>[2.66 to 10.09]                       | 61.50<br>(12.94)  | 63.88<br>(12.59)  | 2.375<br>[-3.32 to 8.07]                       |
| LDL                                  | 103.5<br>(27.67)   | 102.3<br>(19.01)  | -1.224<br>[-13.71 to 11.26]                    | 105.24<br>(27.17) | 102.6<br>(27.83)  | -2.633<br>[-14.44 to 9.18]                     |
| vLDL                                 | 20.69<br>(9.64)    | 20.07<br>(9.26)   | -0.8736<br>[-4.81 to 3.06]                     | 18.76<br>(7.21)   | 20.50<br>(5.70)   | 2.133<br>[-1.59 to 5.86]                       |
| Non-HDL                              | 124.3<br>(34.26)   | 122.2<br>(21.67)  | -2.155<br>[-14.85 to 10.54]                    | 123.94<br>(32.17) | 124.4<br>(28.19)  | 0.4868<br>[-11.50 to 12.47]                    |
| Triglycerides                        | 104.1<br>(47.07)   | 95.79<br>(48.645) | -8.357<br>[-33.71 to 17.00]                    | 90.50<br>(35.68)  | 103.13<br>(29.01) | 12.63<br>[-9.86 to 35.11]                      |
| TC/HDL                               | 3.01<br>(0.61)     | 2.87<br>(0.43)    | 0.1303<br>[-0.09 to 0.35]                      | 3.07<br>(0.73)    | 3.07<br>(0.73)    | 0.08156<br>[-0.12 to 0.29]                     |
| <b>Metabolic Panel</b>               | M (SD)             | M (SD)            | M <sub>diff</sub><br>[95% CI <sub>diff</sub> ] | M (SD)            | M (SD)            | M <sub>diff</sub><br>[95% CI <sub>diff</sub> ] |
| Glucose                              | 93.40<br>(5.67)    | 97.51<br>(6.99)   | 4.106<br>[0.48 to 7.73]                        | 98.29<br>(6.46)   | 97.20<br>(4.59)   | -1.093<br>[4.54 to 2.36]                       |
| BUN                                  | 12.02<br>(2.26)    | 11.48<br>(1.99)   | -0.5387<br>[-2.24 to 1.16]                     | 12.18 (2.35)      | 10.72 (2.73)      | -1.455<br>[-3.09 to 0.18]                      |
| Creatinine                           | 0.87<br>(0.26)     | 0.84<br>(0.20)    | -0.02239<br>[-0.193 to 0.148]                  | 0.94<br>(0.23)    | 0.79<br>(0.20)    | -0.1483<br>[-0.31 to 0.02]                     |
| Na                                   | 141.19<br>(4.55)   | 139.90<br>(3.62)  | -1.228<br>[-3.97 to 1.51]                      | 141.00<br>(4.33)  | 140.56<br>(3.67)  | -0.4126<br>[-3.03 to 2.21]                     |
| K                                    | 4.78<br>(0.39)     | 7.25<br>(10.45)   | 2.470<br>[-1.79 to 6.73]                       | 4.63<br>(0.37)    | 4.57<br>(0.40)    | -0.06100<br>[-4.19 to 4.07]                    |
| Cl                                   | 111.00<br>(4.07)   | 110.73<br>(2.12)  | -0.2646<br>[-2.847 to 2.318]                   | 110.65<br>(2.91)  | 111.19<br>(2.99)  | 0.5260<br>[-1.97 to 3.03]                      |
| <b>Other</b>                         | M (SD)             | M (SD)            | M <sub>diff</sub><br>[95% CI <sub>diff</sub> ] | M (SD)            | M (SD)            | M <sub>diff</sub><br>[95% CI <sub>diff</sub> ] |
| BMI                                  | 25.09 (5.89)       | 24.95 (5.62)      | -0.1320<br>[-0.48 to 0.22]                     | 25.03 (5.83)      | 25.30 (5.74)      | 0.2752<br>[-0.10 to 0.65]                      |

Supplemental Table 4. Shown is an overview of physiological measures at baseline and final time points of each intervention period for all participants (intent-to-treat), in addition to mean differences calculated as final – baseline values. M = mean; SD = standard deviation; M<sub>diff</sub> = mean differences; 95% CI<sub>diff</sub> = 95% CI of the mean difference.

Supplementary Table 5. Maaslin ZINB results for taxon biomarkers of each treatment group.

|                                       |                                                                          | Log2FC | St.Error | P-value  | FDR      |
|---------------------------------------|--------------------------------------------------------------------------|--------|----------|----------|----------|
| Comparator<br>treatment<br>biomarkers | g_[Eubacterium]_siraenum_group; s_uncultured_bacterium                   | -2.12  | 0.263    | 7.21E-16 | 1.47E-13 |
|                                       | g_Barnesiella                                                            | 0.433  | 0.0599   | 5.08E-13 | 6.61E-11 |
|                                       | g_Angelakisella; s_uncultured_bacterium                                  | 1.55   | 0.231    | 1.92E-11 | 2.11E-09 |
|                                       | f_Ruminococcaceae; g_uncultured;<br>s_uncultured_organism                | -2.82  | 0.57     | 7.50E-07 | 4.67E-05 |
|                                       | s_Lachnospiraceae_NK4A136_group_uncultured_Clostridium                   | 1.85   | 0.377    | 8.93E-07 | 5.33E-05 |
|                                       | f_Lachnospiraceae                                                        | 1.1    | 0.231    | 1.97E-06 | 0.000109 |
|                                       | g_[Eubacterium]_coprostanoligenes_group;<br>s_gut_metagenome             | -2.75  | 0.612    | 7.10E-06 | 0.000328 |
|                                       | f_Lachnospiraceae                                                        | -0.571 | 0.133    | 1.85E-05 | 0.00078  |
|                                       | g_Streptococcus                                                          | 1.12   | 0.264    | 2.19E-05 | 0.00087  |
|                                       | g_[Eubacterium]_ventriosum_group;<br>s_uncultured_Lachnospiraceae        | 2.08   | 0.508    | 4.31E-05 | 0.00151  |
|                                       | f_Ruminococcaceae; g_uncultured; s_anaerobic_digester                    | -1.8   | 0.456    | 7.99E-05 | 0.00243  |
|                                       | f_Ruminococcaceae; g_Subdoligranulum                                     | -0.549 | 0.148    | 0.000209 | 0.00535  |
|                                       | f_Lachnospiraceae; g_Lachnoclostridium                                   | 0.841  | 0.228    | 0.000228 | 0.00553  |
|                                       | g_[Eubacterium]_xylanophilum_group                                       | 1.59   | 0.438    | 0.00027  | 0.00645  |
|                                       | o_Oscillospirales; f_UCG-010; g_UCG-010;<br>s_gut_metagenome             | -2.17  | 0.598    | 0.000284 | 0.00667  |
|                                       | g_Coproccoccus; s_unidentified                                           | 1.83   | 0.521    | 0.000459 | 0.00966  |
|                                       | g_Campylobacter; s_Campylobacter_hominis                                 | 2.43   | 0.705    | 0.000563 | 0.0106   |
|                                       | g_[Eubacterium]_nodatum_group                                            | -3.78  | 1.1      | 0.000579 | 0.0108   |
|                                       | f_Oscillospiraceae; g_UCG-005; s_uncultured_rumen                        | 1.26   | 0.37     | 0.000653 | 0.0114   |
|                                       | g_Sellimonas; s_uncultured_bacterium                                     | 0.809  | 0.241    | 0.000767 | 0.0132   |
|                                       | f_Ruminococcaceae                                                        | -2.66  | 0.801    | 0.000895 | 0.0151   |
|                                       | o_Oscillospirales; f_UCG-010; g_UCG-010;<br>s_gut_metagenome             | 3.26   | 1.04     | 0.00161  | 0.0215   |
|                                       | o_Rhodospirillales; f_uncultured; g_uncultured;<br>s_uncultured_organism | -3.2   | 1.02     | 0.00175  | 0.0223   |
|                                       | g_Lachnoclostridium                                                      | -1.53  | 0.49     | 0.00174  | 0.0223   |
|                                       | f_Lachnospiraceae; g_UC5-1-2E3                                           | -2.71  | 0.864    | 0.00173  | 0.0223   |
|                                       | c_Clostridia                                                             | 1.08   | 0.346    | 0.00178  | 0.0225   |
|                                       | g_Parabacteroides                                                        | 0.672  | 0.222    | 0.00244  | 0.0289   |
|                                       | f_Lachnospiraceae                                                        | 1.7    | 0.579    | 0.00337  | 0.0369   |
|                                       | g_Streptococcus                                                          | 0.98   | 0.339    | 0.00381  | 0.0401   |
|                                       | g_Flavonifractor; s_uncultured_bacterium                                 | 1.1    | 0.382    | 0.00395  | 0.041    |
|                                       | g_Shuttleworthia; s_uncultured_bacterium                                 | -1.36  | 0.473    | 0.00412  | 0.0424   |
|                                       | g_Ezakiella; s_uncultured_bacterium                                      | -1.6   | 0.563    | 0.00439  | 0.0449   |
|                                       | f_Ruminococcaceae                                                        | 0.814  | 0.289    | 0.0048   | 0.0484   |
|                                       |                                                                          |        |          |          |          |

|                             |                                                           |        |        |          |          |
|-----------------------------|-----------------------------------------------------------|--------|--------|----------|----------|
| Chitin treatment biomarkers | g_Barnesiella                                             | -0.738 | 0.0452 | 5.96E-60 | 8.53E-57 |
|                             | g_Streptococcus                                           | -2.17  | 0.271  | 1.20E-15 | 2.46E-13 |
|                             | g_Clostridia_UCG-014; s_uncultured_bacterium              | -3.07  | 0.486  | 2.86E-10 | 2.93E-08 |
|                             | g_Coproccoccus; s_unidentified                            | 3.1    | 0.642  | 1.38E-06 | 0.000104 |
|                             | f_Oscillospiraceae; g_UCG-005; s_uncultured_organism      | -1.78  | 0.441  | 5.47E-05 | 0.0023   |
|                             | o_Oscillospirales; f_UCG-010; g_UCG-010; s_gut_metagenome | 1.61   | 0.411  | 9.11E-05 | 0.00335  |
|                             | g_Clostridia_UCG-014; s_uncultured_bacterium              | 2.55   | 0.674  | 0.000152 | 0.00482  |
|                             | g_[Clostridium]_methylopentosem_group                     | -0.926 | 0.245  | 0.000158 | 0.00482  |
|                             | g_Streptococcus                                           | -0.932 | 0.247  | 0.000158 | 0.00482  |
|                             | g_Lachnoclostridium; s_uncultured_Clostridium             | 1.33   | 0.359  | 0.00021  | 0.00578  |
|                             | g_[Eubacterium]_coprostanoligenes_group; s_metagenome     | -0.282 | 0.076  | 0.000206 | 0.00578  |
|                             | g_Clostridia_UCG-014; s_gut_metagenome                    | 2.15   | 0.598  | 0.000324 | 0.00829  |
|                             | f_Oscillospiraceae; g_UCG-005                             | 1.24   | 0.346  | 0.000334 | 0.00839  |
|                             | g_Negativibacillus; s_uncultured_bacterium                | -1.57  | 0.45   | 0.000494 | 0.011    |
|                             | g_Lachnospiraceae_NK4A136_group; s_uncultured_Clostridium | 2.36   | 0.687  | 0.000572 | 0.0117   |
|                             | g_Colidextribacter; s_uncultured_Clostridia               | 2.01   | 0.602  | 0.000867 | 0.0161   |
|                             | g_Marvinbryantia                                          | 1.29   | 0.43   | 0.00267  | 0.0338   |
|                             | f_Ruminococcaceae; g_uncultured; s_uncultured_organism    | -1.09  | 0.365  | 0.00296  | 0.0365   |
|                             | f_Lachnospiraceae; g_[Ruminococcus]_torques_group         | -0.677 | 0.228  | 0.00301  | 0.0369   |
|                             | g_Dialister                                               | 1.09   | 0.379  | 0.00408  | 0.046    |

Supplemental Table 5. Shown are the taxon biomarkers of the comparator treatment and the chitin treatment, which are identified by Maaslin's Zero Inflated Negative Binomial (ZINB) regression as being significantly different pre- to post-treatment for each treatment group, after controlling for false discover rate (FDR). Also shown is the effect size of the pre- to post-intervention difference, indicated by Log2 fold change (FC) values.
